# Supplementary material
Source: PubMed Central journal article supplement (PMC3647747)

## Supplementary data

Figure 1 *In vitro* optimisation of MVA85A delivery through the mesh nebuliser.

A: Plot shows the median number of plaque forming units (pfu) (+/- the interquartile range) collected using an all glass impinger following dilution and nebulisation of  $2.7 \times 10^7$  pfu of MVA85A vaccine compared to the number quantified from an identically diluted control sample.

B: Plot shows the mean time taken to nebulise (minutes) 1 ml phosphate buffered saline through each of 4 mesh caps by two Omron mesh nebulisers (A and B).

Supplementary data

Figure 1:

A

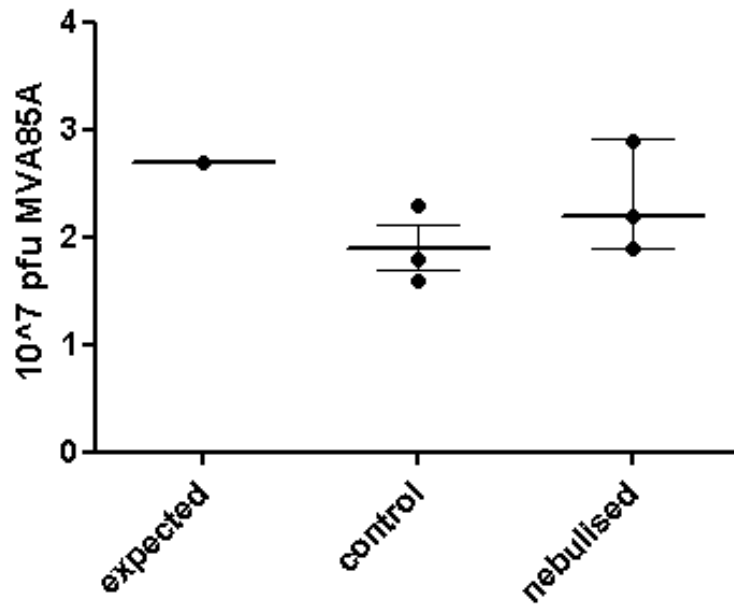

B

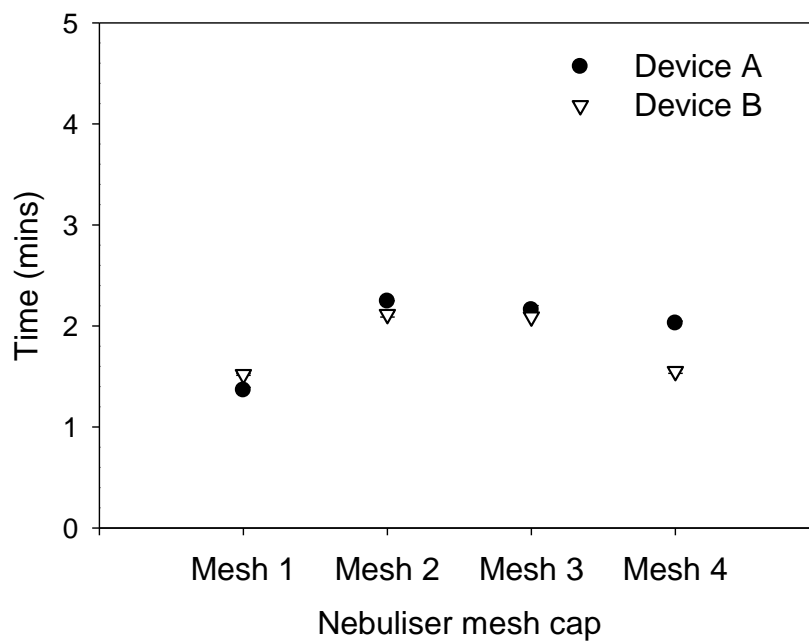

Supplement: CVI.00690-12_zcd999094719so1.pdf [file CVI.00690-12_zcd999094719so1.pdf]
